# Supplementary material for: Impact of mass vaccination on SARS-CoV-2 infections among the total multiple sclerosis population receiving immunomodulatory disease-modifying therapies in England
Source: Research Square preprint supplement (doi:10.21203/rs.3.rs-1016584/v1), 2021-10-26
Supplement: Supplementary file 1 [file ad096e65f849c6428dd2c97c.xlsx]

## Sheet: Sheet1
Month-Year	Monthly incidence rate rtio (IRR) and 95% confidence interval (95% CI) of SARS-CoV-2 infection in people with multiple sclerosis receiving a disease-modifying therapy compared to the general population (20-years-old or above)
	Alemtuzumab			Beta-interferons			Cladribine			Dimethyl fumarate			Fingolimod			Glatiramer acetate			Natalizumab			Ocrelizumab			Teriflunomide
	IRR	Lower 95% CI	Upper 95% CI	IRR	Lower 95% CI	Upper 95% CI	IRR	Lower 95% CI	Upper 95% CI	IRR	Lower 95% CI	Upper 95% CI	IRR	Lower 95% CI	Upper 95% CI	IRR	Lower 95% CI	Upper 95% CI	IRR	Lower 95% CI	Upper 95% CI	IRR	Lower 95% CI	Upper 95% CI	IRR	Lower 95% CI	Upper 95% CI
2020-03-31	3.10752	0.376319	11.2264	0.614448	0.0744093	2.21978	0	0	7.38178	1.02966	0.334303	2.40312	1.29138	0.266299	3.7743	0.423719	0.0107273	2.36098	0.77929	0.0943716	2.81529	0.965345	0.0244397	5.37894	0	0	3.85766
2020-04-30	2.1363	0.693637	4.98555	0.408552	0.132653	0.953452	0	0	2.00535	0.854144	0.488201	1.38714	0.564529	0.183298	1.31746	0.316146	0.065196	0.923936	1.68538	0.981763	2.69858	0.785184	0.161921	2.2947	0.550679	0.066689	1.98929
2020-05-31	2.27628	0.46941	6.65254	0.572072	0.155866	1.4648	1.92939	0.233653	6.9699	0.636155	0.255757	1.3108	0.39619	0.0479795	1.43123	0.355799	0.043088	1.28532	0.674386	0.183742	1.72678	1.3322	0.274724	3.89342	0	0	1.75786
2020-06-30	2.09576	0.0530579	11.678	0.394745	0.0099937	2.1996	0	0	9.5859	0.986542	0.268777	2.52628	0.547585	0.013863	3.05125	0.486547	0.0123178	2.71113	0.917194	0.11107	3.31359	1.10615	0.0280041	6.16368	2.61519	0.316693	9.44802
2020-07-31	2.88126	0.0729428	16.0556	1.09227	0.132268	3.94626	3.35196	0.0848592	18.6785	0.670923	0.0812452	2.42399	2.25849	0.465708	6.60141	0	0	2.44566	0.623018	0.0157725	3.47171	0	0	4.84672	1.79031	0.0453241	9.97635
2020-08-31	0	0	7.02572	0	0	1.34054	2.11979	0.0536662	11.8118	0.664569	0.137041	1.94238	0.501697	0.0127014	2.79553	0	0	1.60392	0.409344	0.0103633	2.28093	2.2996	0.474201	6.72119	0	0	4.36269
2020-09-30	1.38565	0.285749	4.04957	0.356572	0.0971521	0.912995	1.45523	0.300099	4.25293	0.917758	0.534606	1.46949	1.10968	0.507401	2.1066	1.47827	0.808154	2.4804	0.790915	0.341452	1.55848	0.831006	0.26982	1.93936	1.42852	0.463826	3.33379
2020-10-31	1.74798	0.978323	2.88307	0.386118	0.224925	0.61822	1.04455	0.477631	1.9829	0.779664	0.590499	1.01017	0.784865	0.507917	1.15863	1.1494	0.83181	1.54826	0.918872	0.646961	1.26657	1.13663	0.761206	1.63241	1.66183	1.05344	2.4936
2020-11-30	1.75658	1.02326	2.81249	0.587433	0.393408	0.843663	0.795372	0.343383	1.56721	1.01896	0.812748	1.26157	0.953616	0.660398	1.3326	0.94708	0.676598	1.28968	0.918017	0.661617	1.24091	0.895485	0.590123	1.3029	0.513092	0.221515	1.011
2020-12-31	1.89421	1.28702	2.68871	0.647395	0.484938	0.846818	1.15528	0.705672	1.78425	1.2656	1.08451	1.46828	0.98338	0.746714	1.27126	1.04888	0.823589	1.31679	0.989703	0.779764	1.23878	1.07194	0.807523	1.39529	0.952883	0.616651	1.40665
2021-01-31	1.24148	0.818139	1.8063	0.666429	0.521435	0.839266	1.00815	0.645939	1.50006	0.987382	0.84839	1.14265	0.73605	0.557473	0.953647	0.798846	0.628338	1.00137	0.998044	0.813777	1.21157	1.25554	1.00562	1.54872	0.632236	0.396217	0.957218
2021-02-28	0.679576	0.18516	1.74001	0.478182	0.261423	0.802323	1.96722	1.04745	3.36407	1.03111	0.767705	1.35576	1.2951	0.853461	1.88435	0.859867	0.538864	1.30188	1.00341	0.666747	1.45025	0.793242	0.443965	1.30836	0.627595	0.230314	1.36603
2021-03-31	1.25171	0.258128	3.65813	1.2644	0.707648	2.08553	2.15617	0.791257	4.69323	0.945687	0.569341	1.47689	1.43221	0.740018	2.50189	1.44553	0.80902	2.38429	0.965355	0.481886	1.72736	1.16044	0.53061	2.20296	0.515035	0.0623722	1.86053
2021-04-30	1.90311	0.230468	6.87511	0	0	0.708866	1.5801	0.191351	5.70819	0.568701	0.184646	1.32726	1.64985	0.605433	3.59132	0.880559	0.239912	2.25474	0.601287	0.123995	1.75733	0.859191	0.177179	2.51109	0.578707	0.0146513	3.22452
2021-05-31	1.99502	0.241598	7.20714	0.608251	0.125431	1.77769	1.59346	0.192969	5.75649	0.835255	0.335794	1.7211	1.74247	0.639417	3.79294	1.15537	0.375126	2.69647	0.631725	0.130272	1.8463	1.45824	0.473461	3.40332	0.604137	0.0152951	3.36622
2021-06-30	0.586799	0.121011	1.7149	0.403482	0.193482	0.742033	1.05254	0.42317	2.16867	0.401583	0.233932	0.642989	0.753938	0.401433	1.28929	0.639141	0.349418	1.07239	0.836034	0.51066	1.29122	1.32723	0.850362	1.97487	0.596299	0.193615	1.39159
2021-07-31	1.12825	0.679275	1.76191	0.480832	0.341915	0.65732	0.956011	0.599123	1.44742	0.928412	0.775109	1.10316	1.35238	1.06551	1.69273	0.5702	0.409182	0.77355	0.763744	0.58281	0.983102	1.82021	1.49873	2.19022	0.688922	0.414773	1.07584
2021-08-31	1.53578	0.973543	2.30444	0.602307	0.435888	0.811315	1.60691	1.11282	2.24553	1.1477	0.96607	1.35357	1.68306	1.34053	2.08644	0.915373	0.695072	1.18335	1.21127	0.966144	1.49967	1.8567	1.51703	2.24974	1.47857	1.03556	2.04699
