# Supplementary material for: Impact of mass vaccination on SARS-CoV-2 infections among the total multiple sclerosis population receiving immunomodulatory disease-modifying therapies in England
Source: Research Square preprint supplement (doi:10.21203/rs.3.rs-1016584/v1), 2021-10-26
Supplement: Supplementary file 2 [file bf83847a45cac8139ad1f01f.xlsx]

## Sheet: Sheet1
Month-Year	Total number of people with multiple sclerosis receiving a disease-modifying therapy									General population (20-years-old or above)	Total number of SARS-CoV-2 infections in people with multiple sclerosis receiving a disease-modifying therapy									SARS-CoV-2 infections in general population (20-years-old or above)	Incidence rate (%) and 95% confidence interval of SARS-CoV-2 infection in people with multiple sclerosis receiving a disease-modifying therapy																											Incidence rate (%) of SARS-CoV-2 infection in general population (20-years-old or above)
	Alemtuzumab	Beta-interferons	Cladribine	Dimethyl fumarate	Fingolimod	Glatiramer acetate	Natalizumab	Ocrelizumab	Teriflunomide		Alemtuzumab	Beta-interferons	Cladribine	Dimethyl fumarate	Fingolimod	Glatiramer acetate	Natalizumab	Ocrelizumab	Teriflunomide		Alemtuzumab			Beta-interferons			Cladribine			Dimethyl fumarate			Fingolimod			Glatiramer acetate			Natalizumab			Ocrelizumab			Teriflunomide
																					IR	Lower 95% CI	Upper 95% CI	IR	Lower 95% CI	Upper 95% CI	IR	Lower 95% CI	Upper 95% CI	IR	Lower 95% CI	Upper 95% CI	IR	Lower 95% CI	Upper 95% CI	IR	Lower 95% CI	Upper 95% CI	IR	Lower 95% CI	Upper 95% CI	IR	Lower 95% CI	Upper 95% CI	IR	Lower 95% CI	Upper 95% CI
2020-03-31	1132	5725	879	8541	4086	4151	4514	1822	1682	56286961	2	2	0	5	3	1	2	1	0	32002	0.176678	0.0213966	0.638223	0.0349345	0.00423073	0.126195	0	0	0.419668	0.0585412	0.0190081	0.136616	0.0734214	0.0151413	0.214569	0.0240906	0.00060992	0.134224	0.0443066	0.00536573	0.160051	0.0548847	0.00138956	0.305798	0	0	0.219315	0.0568551
2020-04-30	1140	5961	896	9124	4314	4622	4913	1861	1769	56286961	5	5	0	16	5	3	17	3	2	115561	0.438596	0.142411	1.02354	0.0838785	0.0272351	0.195745	0	0	0.411705	0.175362	0.100234	0.284776	0.115902	0.037633	0.270476	0.064907	0.0133854	0.189686	0.346021	0.20157	0.554013	0.161204	0.0332441	0.471106	0.113058	0.0136919	0.408405	0.205307
2020-05-31	1143	6064	899	9543	4378	4875	5144	1953	1820	56286961	3	4	2	7	2	2	4	3	0	64902	0.262467	0.054127	0.767041	0.0659631	0.0179727	0.168892	0.222469	0.0269421	0.803636	0.0733522	0.0294914	0.151134	0.045683	0.00553242	0.165023	0.0410256	0.0049684	0.148199	0.0777605	0.0211871	0.199098	0.15361	0.031678	0.448913	0	0	0.202686	0.115306
2020-06-30	1158	6148	934	9840	4432	4988	5292	2194	1856	56286961	1	1	0	4	1	1	2	1	2	23193	0.0863558	0.00218634	0.481144	0.0162655	0.00041181	0.0906253	0	0	0.394955	0.0406504	0.0110759	0.104081	0.0225632	0.00057125	0.125714	0.0200481	0.00050757	0.111701	0.0377929	0.0045769	0.136521	0.0455789	0.00115396	0.253949	0.107759	0.0130501	0.389261	0.0412049
2020-07-31	1175	6199	1010	10092	4497	5107	5434	2577	1891	56286961	1	2	1	2	3	0	1	0	1	16626	0.0851064	0.00215471	0.474182	0.0322633	0.00390723	0.116546	0.0990099	0.00250671	0.551648	0.0198177	0.00240001	0.0715883	0.0667111	0.0137574	0.194958	0	0	0.0722318	0.0184026	0.00046591	0.102533	0	0	0.143146	0.0528821	0.00133886	0.29464	0.0295379
2020-08-31	1191	6242	1070	10239	4521	5217	5541	2959	1918	56286961	0	0	1	3	1	0	1	3	0	24816	0	0	0.30973	0	0	0.0590977	0.0934579	0.00236615	0.520714	0.0292997	0.00604231	0.0856263	0.022119	0.00056	0.123239	0	0	0.0707088	0.0180473	0.00045692	0.100553	0.101386	0.0209082	0.296292	0	0	0.192329	0.0440884
2020-09-30	1213	6285	1155	10378	4544	5306	5667	3371	1961	56286961	3	4	3	17	9	14	8	5	5	100465	0.247321	0.0510035	0.722776	0.0636436	0.0173407	0.162953	0.25974	0.0535647	0.759071	0.163808	0.0954242	0.262273	0.198063	0.0905672	0.375986	0.263852	0.144251	0.442699	0.141168	0.0609464	0.278158	0.148324	0.0481604	0.346139	0.254972	0.0827887	0.59502	0.178487
2020-10-31	1232	6321	1237	10496	4573	5371	5781	3663	1987	56286961	15	17	9	57	25	43	37	29	23	392059	1.21753	0.681444	2.00814	0.268945	0.15667	0.430607	0.727567	0.33269	1.38115	0.543064	0.411311	0.703603	0.546687	0.353787	0.807018	0.800596	0.579395	1.0784	0.640028	0.450638	0.882194	0.791701	0.530215	1.13701	1.15752	0.733771	1.73685	0.696536
2020-11-30	1247	6361	1296	10622	4594	5442	5895	3885	2009	56286961	17	29	8	84	34	40	42	27	8	436840	1.36327	0.794156	2.18273	0.455903	0.305326	0.654753	0.617284	0.266499	1.2163	0.790812	0.630782	0.979078	0.740096	0.512538	1.03421	0.735024	0.525112	1.00089	0.712468	0.513484	0.96305	0.694981	0.457997	1.01116	0.398208	0.171918	0.784629	0.776094
2020-12-31	1280	6403	1354	10753	4613	5518	6006	4013	2052	56286961	31	53	20	174	58	74	76	55	25	719666	2.42188	1.64555	3.43766	0.827737	0.620032	1.0827	1.4771	0.902254	2.28127	1.61815	1.38665	1.87726	1.25732	0.954733	1.62537	1.34107	1.05303	1.68359	1.2654	0.996992	1.58384	1.37055	1.03248	1.78395	1.21832	0.788435	1.79849	1.27857
2021-01-31	1300	6458	1423	10897	4629	5612	6109	4142	2080	56286961	27	72	24	180	57	75	102	87	22	941647	2.07692	1.3687	3.02181	1.1149	0.872338	1.40403	1.68658	1.08062	2.50949	1.65183	1.41933	1.91156	1.23137	0.932626	1.59538	1.33642	1.05118	1.67522	1.66967	1.36141	2.02686	2.10043	1.68236	2.59088	1.05769	0.66285	1.60136	1.67294
2021-02-28	1312	6526	1473	11025	4647	5703	6220	4215	2131	56286961	4	14	13	51	27	22	28	15	6	252520	0.304878	0.083069	0.780609	0.214527	0.117284	0.359939	0.882553	0.469922	1.50919	0.462585	0.344425	0.608214	0.58102	0.382896	0.845354	0.385762	0.241755	0.584048	0.450161	0.299129	0.650608	0.355872	0.199179	0.586956	0.281558	0.103327	0.612833	0.44863
2021-03-31	1335	6608	1550	11191	4667	5780	6347	4320	2163	56286961	3	15	6	19	12	15	11	9	2	101052	0.224719	0.0463425	0.656725	0.226998	0.127049	0.374398	0.387097	0.142058	0.842547	0.169779	0.102218	0.265131	0.257124	0.13286	0.449145	0.259516	0.145249	0.428031	0.17331	0.0865158	0.3101	0.208333	0.0952633	0.395482	0.0924642	0.0111978	0.334012	0.17953
2021-04-30	1355	6710	1632	11336	4689	5857	6433	4502	2228	56286961	2	0	2	5	6	4	3	3	1	43655	0.147601	0.0178752	0.533187	0	0	0.0549759	0.122549	0.0148413	0.442689	0.0441073	0.0143215	0.102932	0.127959	0.0469587	0.278513	0.0682943	0.0186079	0.174861	0.0466345	0.00961716	0.136286	0.0666371	0.0137422	0.194742	0.0448833	0.00113635	0.250074	0.0775579
2021-05-31	1373	6755	1719	11478	4716	5927	6504	4696	2267	56286961	2	3	2	7	6	5	3	5	1	41098	0.145666	0.0176409	0.526197	0.0444115	0.00915873	0.129789	0.116347	0.0140901	0.420284	0.0609862	0.0245196	0.125655	0.127226	0.0466899	0.276918	0.0843597	0.0273914	0.196867	0.0461255	0.00951218	0.134798	0.106474	0.0345717	0.248474	0.0441112	0.0011168	0.245772	0.0730151
2021-06-30	1406	6816	1829	11642	4742	6024	6579	4973	2306	56286961	3	10	7	17	13	14	20	24	5	204670	0.213371	0.0440023	0.623561	0.146714	0.0703549	0.269812	0.382723	0.153874	0.788555	0.146023	0.0850638	0.233797	0.274146	0.145971	0.468798	0.232404	0.127057	0.389934	0.303998	0.18569	0.4695	0.482606	0.309215	0.71808	0.216826	0.0704027	0.505999	0.363619
2021-07-31	1427	6873	1950	11774	4762	6093	6657	5214	2337	56286961	19	39	22	129	76	41	60	112	19	664252	1.33146	0.801629	2.07925	0.567438	0.403504	0.775706	1.12821	0.70704	1.70812	1.09563	0.914734	1.30184	1.59597	1.25744	1.99759	0.672903	0.482887	0.912869	0.901307	0.687792	1.16016	2.14806	1.76871	2.58468	0.813008	0.489484	1.26961	1.18012
2021-08-31	1451	6917	2050	11903	4778	6139	6719	5427	2359	56286961	23	43	34	141	83	58	84	104	36	580952	1.58511	1.00483	2.37845	0.621657	0.449896	0.837368	1.65854	1.14858	2.31764	1.18458	0.997125	1.39702	1.73713	1.38361	2.15343	0.944779	0.71741	1.22135	1.25019	0.997197	1.54781	1.91634	1.56579	2.32197	1.52607	1.06884	2.11273	1.03213
