# Supplementary material for: Impact of mass vaccination on SARS-CoV-2 infections among the total multiple sclerosis population receiving immunomodulatory disease-modifying therapies in England
Source: Research Square preprint supplement (doi:10.21203/rs.3.rs-1016584/v1), 2021-10-26
Supplement: Supplementary file 3 [file f00ad5c1af8a8c3e8207ba35.xlsx]

## Sheet: Sheet1
	Alemtuzumab			Beta-interferons			Cladribine			Dimethyl fumarate			Fingolimod			Glatiramer acetate			Natalizumab			Ocrelizumab			Teriflunomide
	Incidence rate ratio (IRR)	Lower 95% confidence interval (CI)	Upper 95% CI	IRR	Lower 95% CI	Upper 95% CI	IRR	Lower 95% CI	Upper 95% CI	IRR	Lower 95% CI	Upper 95% CI	IRR	Lower 95% CI	Upper 95% CI	IRR	Lower 95% CI	Upper 95% CI	IRR	Lower 95% CI	Upper 95% CI	IRR	Lower 95% CI	Upper 95% CI	IRR	Lower 95% CI	Upper 95% CI
Pre-mass SARS-CoV-2 vaccination (November 2020, December 2020, and January 2021)	1.57723	1.24059	1.97708	0.644784	0.546966	0.755048	1.0275	0.767382	1.34743	1.0923	0.992374	1.19955	0.866698	0.733119	1.01757	0.917865	0.791662	1.05847	0.983107	0.857476	1.12197	1.12967	0.965766	1.31343	0.720801	0.543004	0.938226
Post-mass SARS-CoV-2 vaccination (June, July, and August 2021)	1.22338	0.892339	1.63699	0.519988	0.419181	0.637723	1.25877	0.967266	1.61052	0.946395	0.84005	1.06248	1.40261	1.20082	1.62862	0.720894	0.594115	0.866721	0.957174	0.816278	1.11541	1.79018	1.57082	2.03159	0.997994	0.761571	1.28462
